# Supplementary material for: Self-reports vs. physical measures of spinal stiffness
Source: PeerJ. 2020 Dec 7;8:e9598. doi: 10.7717/peerj.9598 (PMC7727369; doi:10.7717/peerj.9598)
Supplement: Supplemental Information 3 [file peerj-08-9598-s003.xlsx]

## Sheet: Ark1
SID	L5 pre	L4 pre	L3 pre	L2 pre	L1 pre	LSIQ pre Q1	LSIQ pre Q2	LSIQ pre Q3	LSIQ pre Q4	LSIQ pre Q5	LSIQ pre Q6	LSIQ pre Q7	LSIQ pre Q8	LSIQ pre Q9	LSIQ pre Q10	LSIQ pre Q11	LSIQ pre Q12	LSIQ pre Q13	LSIQ pre Q14	LSIQ pre Q15	LSIQ pre total	LSDI pre Q1	LSDI pre Q2	LSDI pre Q3	LSDI pre Q4	LSDI pre Q5	LSDI pre Q6	LSDI pre Q7	LSDI pre Q8	LSDI pre Q9	LSDI pre Q10	LSDI pre total	L5 post	L4 post	L3 post	L2 post	L1 post	LSIQ post Q1	LSIQ post Q2	LSIQ post Q3	LSIQ post Q4	LSIQ post Q5	LSIQ post Q6	LSIQ post Q7	LSIQ post Q8	LSIQ post Q9	LSIQ post Q10	LSIQ post Q11	LSIQ post Q12
1	5.817	4.857	4.207	3.89	3.624	2	1	1	1	1	2	1	1	1	2	1	2	1	1	2	10	2	2	1	1	2	1	1	2	2	1	15	5.608	4.817	4.377	4.174	3.927	2	2	2	2	1	2	1	1	1	2	1	2
2	4.453	4.065	3.983	3.756	3.568	2	2	1	2	1	2	1	1	1	1	1	2	1	1	2	9	2	1	0	2	2	1	1	0	2	1	12	4.135	4.126	4.183	4.17	4.02	2	2	1	2	1	2	1	1	1	1	1	2
3	3.944	3.687	3.972	4.213	4.194	2	1	1	1	1	1	1	1	1	2	1	1	1	1	2	12	2	2	0	1	2	2	1	1	1	1	13	4.567	4.743	4.974	5.267	5.269	2	2	1	1	1	2	2	1	1	2	1	1
4	5.499	4.854	5.093	5.058	5.149	2	1	1	2	1	1	1	1	1	2	1	2	1	1	1	11	2	2	2	1	2	2	1	1	2	1	16	6.222	5.463	5.324	5.05	5.104	2	1	1	2	1	1	1	1	1	2	1	2
5	6.217	5.925	5.938	6.091	6.194	2	1	1	2	2	2	1	1	1	1	1	1	2	1	2	9	1	1	0	1	1	1	0	0	2	1	8	5.38	5.491	5.528	5.665	5.716	1	1	1	2	1	2	1	1	1	1	1	1
6	4.475	3.638	3.413	3.336	3.355	2	1	1	1	1	1	1	1	1	1	1	2	1	1	2	12	2	2	0	1	2	2	2	1	1	0	13	4.059	4.055	3.856	4.09	4.671	1	1	1	2	1	1	1	2	1	1	1	2
7	4.679	4.439	4.49	4.541	4.492	1	1	1	2	2	2	2	1	1	1	1	2	2	2	2	7	1	1	0	0	2	1	0	0	0	0	5	4.638	4.305	4.624	4.572	4.65	2	2	1	2	2	2	2	1	1	1	1	2
8	4.927	4.657	4.338	4.143	4.104	1	1	1	1	1	1	1	1	1	1	1	1	1	1	2	14	2	2	2	2	2	2	2	2	1	0	17	4.673	4.22	3.972	3.914	3.78	2	1	1	2	1	1	1	1	1	2	1	1
9	4.59	4.634	4.38	4.234	4.173	1	1	1	2	1	1	1	1	1	2	1	1	1	1	2	12	1	2	2	0	1	1	2	0	2	0	11	5.484	5.163	4.989	4.991	5.031	2	1	2	2	1	1	1	1	1	2	1	2
10	4.648	4.615	4.697	4.345	4.278	2	1	1	2	1	1	1	1	1	1	1	2	1	2	2	10	1	1	0	0	1	1	1	1	1	0	7	5.248	4.628	4.366	4.186	3.972	2	1	1	2	1	1	1	1	1	1	1	2
11	4.156	3.894	3.752	3.746	3.806	1	1	1	2	1	1	2	1	1	2	1	2	1	1	2	10	2	2	1	1	2	2	2	1	2	3	18	5.974	5.183	4.791	4.614	4.404	2	1	1	2	2	1	1	1	1	2	1	2
12	5.834	5.561	5.164	4.852	4.401	2	1	2	1	1	1	1	2	1	2	1	1	1	1	2	10	2	2	2	2	1	1	1	1	2	1	15	4.845	5.114	5.25	4.983	4.649	1	1	1	1	2	2	1	2	1	2	1	2
13	4.079	4.027	3.943	3.982	3.764	1	1	1	1	1	1	1	1	1	1	1	1	1	2	1	14	2	2	1	0	2	2	1	2	2	1	15	4.183	4.258	4.26	4.251	4.036	1	1	1	1	1	1	1	1	1	1	1	2
14	5.058	4.557	4.259	4.023	4.115	2	2	1	1	1	2	1	1	1	1	1	2	1	1	1	11	2	2	2	2	2	2	2	1	1	1	17	4.701	4.514	4.572	4.476	4.391	2	1	2	2	1	1	2	1	1	2	1	2
15	5.264	5.231	5.555	5.82	5.88	2	1	1	2	1	1	1	2	2	1	1	2	1	1	2	9	1	1	1	1	1	1	1	1	1	1	10	5.454	5.056	4.826	4.833	4.856	1	2	1	1	1	2	1	2	2	1	1	2
16	4.68	4.459	4.168	4.051	4.01	2	1	1	2	1	1	1	1	1	2	1	2	1	2	2	9	2	2	0	0	2	2	2	1	2	2	15	5.213	4.782	4.459	4.358	4.239	2	2	1	2	1	1	1	1	1	1	1	2
17	4.39	3.951	3.818	3.852	3.856	2	2	1	1	1	2	1	1	1	1	1	1	2	2	2	9	2	2	1	2	2	1	2	2	2	2	18	4.39	3.951	3.818	3.852	3.856	2	2	1	1	2	2	2	1	1	2	1	1
18	5.845	5.673	5.312	4.98	4.887	2	1	1	2	1	2	1	1	1	1	1	1	1	2	1	11	1	2	0	0	2	1	1	1	1	0	9	5.701	5.49	5.237	4.959	4.563	2	1	1	2	1	2	2	2	1	2	2	1
19	6.621	7.058	6.746	6.924	6.094	2	1	2	1	2	2	1	2	2	1	1	1	1	1	2	8	1	1	2	0	1	2	1	1	2	1	12	5.556	5.641	5.252	4.943	4.545	2	1	2	2	1	1	2	1	1	1	1	1
20	6.188	5.837	5.643	5.994	6.365	1	1	1	1	1	2	1	1	1	1	1	1	1	2	1	13	1	2	1	0	2	1	2	1	2	1	13	5.197	4.889	4.825	5.044	5.327	2	1	1	1	1	2	1	1	1	1	1	1
21	3.997	3.684	3.81	4.26	4.944	1	2	1	1	1	1	1	2	1	1	1	2	1	2	2	10	2	3	1	3	3	2	3	2	2	2	23	4.501	4.224	4.663	4.733	4.83	1	1	1	1	1	1	1	2	1	1	1	2
22	2.741	3.223	3.719	4.571	4.66	1	1	1	1	1	1	1	1	1	2	1	2	2	1	2	11	1	1	1	0	2	2	2	2	2	2	15	2.82	2.764	2.882	2.764	2.745	2	1	1	1	1	1	2	1	1	2	1	1
23	4.254	4.332	4.327	4.449	4.441	2	1	1	1	1	1	1	2	1	1	1	2	1	1	2	11	2	2	1	2	2	1	2	0	2	0	14	5.041	5.322	5.38	5.504	5.351	1	1	1	1	1	1	2	1	1	2	1	2
24	4.096	3.615	2.889	2.546	2.524	2	2	1	2	1	1	1	2	1	1	1	2	1	2	1	9	1	1	2	0	1	1	1	1	2	1	11	2.956	2.779	2.542	2.583	2.732	2	2	1	2	2	2	1	2	1	1	2	2
25	3.961	3.507	3.309	3.265	3.609	1	1	1	1	1	2	2	1	1	1	1	1	1	1	1	13	0	1	1	0	1	1	1	1	1	1	8	4.278	3.949	3.503	3.396	3.312	2	1	1	2	2	2	1	1	1	1	1	1
26	4.355	4.069	3.728	3.637	3.466	2	2	1	2	1	2	1	1	1	2	1	2	2	1	1	8	2	2	0	0	2	2	2	1	1	0	12	3.968	3.686	3.573	3.768	3.74	2	1	1	2	1	2	1	1	1	2	1	1
27	5.718	5.336	5.137	4.714	4.889	2	2	1	1	1	1	1	1	1	2	1	1	1	2	1	11	2	2	2	2	3	2	2	2	2	2	21	5.697	5.616	5.264	5.271	5.197	2	2	2	1	2	2	1	1	1	2	1	2
28	7.245	6.553	6.519	6.535	6.286	2	1	1	1	1	2	1	1	1	1	1	1	2	2	2	10	1	2	0	0	1	0	1	1	1	0	7	6.949	6.633	6.636	6.658	6.665	2	2	1	2	1	2	1	1	1	1	1	2
29	4.951	4.599	4.41	4.184	4.233	2	1	1	1	1	2	2	1	1	2	1	1	1	1	2	10	1	2	1	0	1	0	1	0	0	0	6	5.147	4.623	4.539	4.112	4.452	2	1	1	1	1	2	2	1	1	2	1	2
[truncated: 15 more columns]
